# Supplementary material
Source: PubMed Central journal article supplement (PMC4761472)
Supplement: NIHMS748706-supplement-1.pdf [file NIHMS748706-supplement-1.pdf]

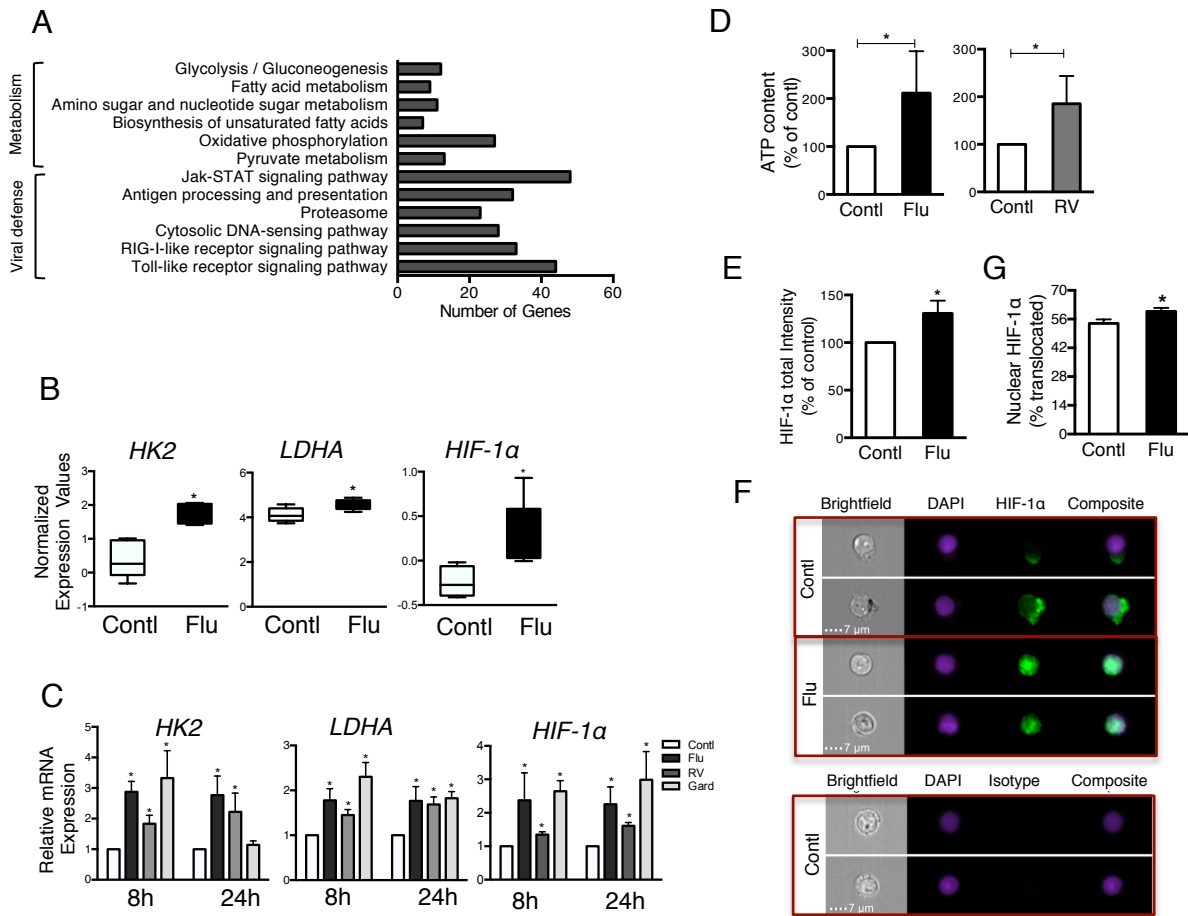

**SUPPLEMENTAL FIGURE 1.** Viral exposure upregulates key glycolytic genes, increases ATP content and activates HIF-1 $\alpha$  in human pDCs. **(A)** Total RNA was purified from pDCs treated with or without Flu for 8 h and DNA microarray analysis was performed using the HumanHT-12 v4 Expression BeadChip. Microarray data deposited in GEO database, accession # GSE68849 (<http://www.ncbi.nlm.nih.gov/geo/query/acc.cgi?token=qfarmocyrvcdvbsb&acc=GSE68849>). Raw data was normalized using quantile normalization. Significantly altered genes (paired t-test,  $p \leq 0.05$ ) were further subjected to pathway analysis using Database for Annotation, Visualization and Integrated Discovery. The graph displays differentially expressed genes grouped into functional pathways based on annotation analysis. **(B)** Normalized expression values of *HK2*, *LDHA* and *HIF-1 $\alpha$*  genes are shown. **(C)** qRT-PCR results showing relative expression of *HK2*, *LDHA* and *HIF-1 $\alpha$*  to *HPRT* in pDCs exposed to Flu, RV or gardiquimod for 8 and 24 h. **(D)** ATP concentration was measured in the lysates of pDCs exposed to Flu or RV or no virus (control) *ex vivo* for 24 h using an ATP luciferase assay kit. ATP levels were normalized to control conditions. pDCs were stained with HIF-1 $\alpha$  Dy1-488 or rabbit IgG isotype control-488 Ab and DAPI after 24 h incubation with or without Flu. **(E)** Total HIF-1 $\alpha$  expression, shown as percent of control (based on mean fluorescence gated on total live pDCs). **(F)** pDC images displaying nuclear DAPI and HIF-1 $\alpha$  or isotype staining. Images represent 1 of 9 experiments. **(G)** Summary of HIF-1 $\alpha$  nuclear translocation in control versus Flu-treated pDCs. Data represent mean  $\pm$  SEM,  $N=4-6$  in A-C;  $N=3$  in D and  $N=9$  in E and G; \* $p \leq 0.05$ , paired t-test.

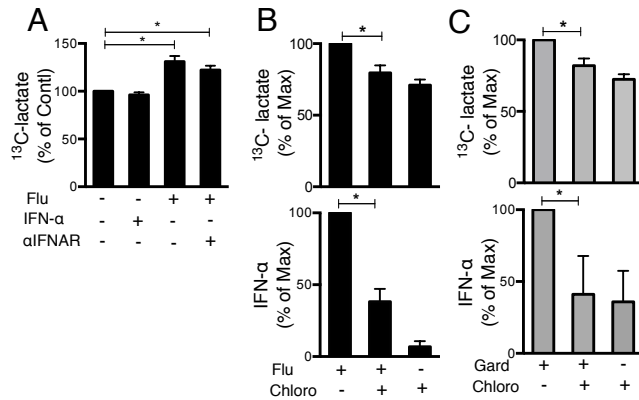

**SUPPLEMENTAL FIGURE 2.** Flu-induced glycolysis in pDCs is independent of type I IFN signaling. (A) pDCs were exposed to IFN- $\alpha$  (1000 U/ml; PBL Assay Science), Flu (MOI 0.1), or Flu in the presence anti-human IFNAR monoclonal Ab (5  $\mu\text{g}/\text{ml}$ ; PBL Assay Science) for 24 h.  $^{13}\text{C}$ -lactate in pDC supernatants was quantified by mass spectrometry and normalized to the control condition. The effect of chloroquine (2  $\mu\text{g}/\text{ml}$ ; Sigma-Aldrich) on (B) Flu- and (C) gardiquimod-treated pDC  $^{13}\text{C}$ -lactate and IFN- $\alpha$  concentrations is shown. Data were normalized to maximal lactate and IFN- $\alpha$  induction. Data represent mean  $\pm$  SEM, N=3-4. \* $p \leq 0.05$ , Two-way ANOVA followed by Tukey's test, # represents not detected.
